# Supplementary material for: Producing high yield of levoglucosan by pyrolyzing nonthermal plasma-pretreated cellulose
Source: Royal Society of Chemistry journal article supplement (doi:10.1039/d0gc00255k), 2020-01-01
Supplement: d0gc00255k1.pdf [file d0gc00255k1.pdf]

## **SUPPORTING INFORMATION**

### **Producing High Yield of Levoglucosan by Pyrolyzing Non-thermal Plasma- Pretreated Cellulose**

Lusi A<sup>1</sup>, Haiyang Hu<sup>2</sup>, Xianglan Bai<sup>1\*</sup>

<sup>1</sup>Department of Mechanical Engineering, Iowa State University, Ames, IA 50011 USA

<sup>2</sup>Department of Aerospace Engineering, Iowa State University, Ames, IA 50011 USA

\*Corresponding author, Email: [bx19801@iastate.edu](mailto:bx19801@iastate.edu)

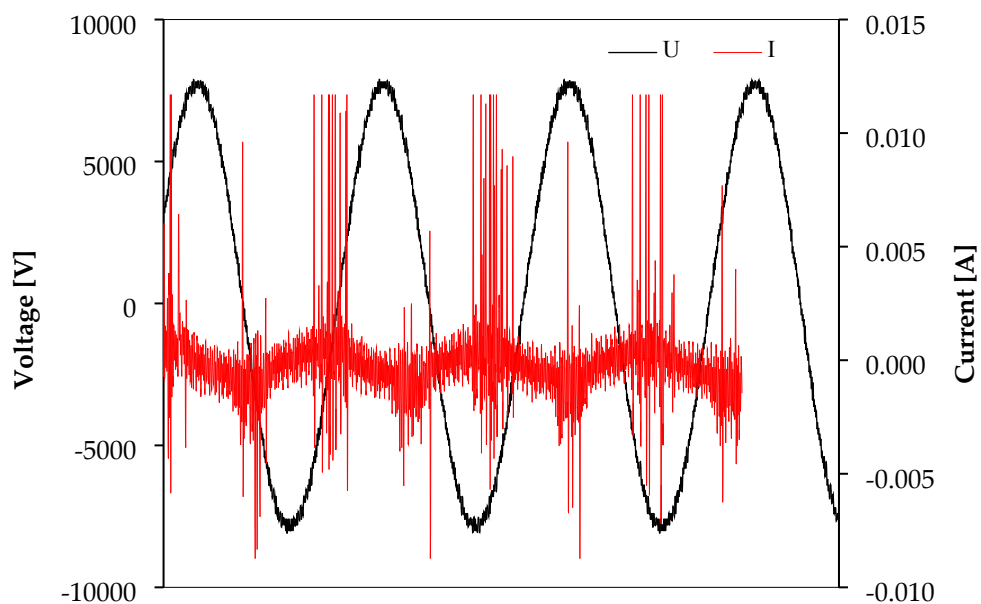

**Fig S1.** Voltage-current graph during plasma treatment

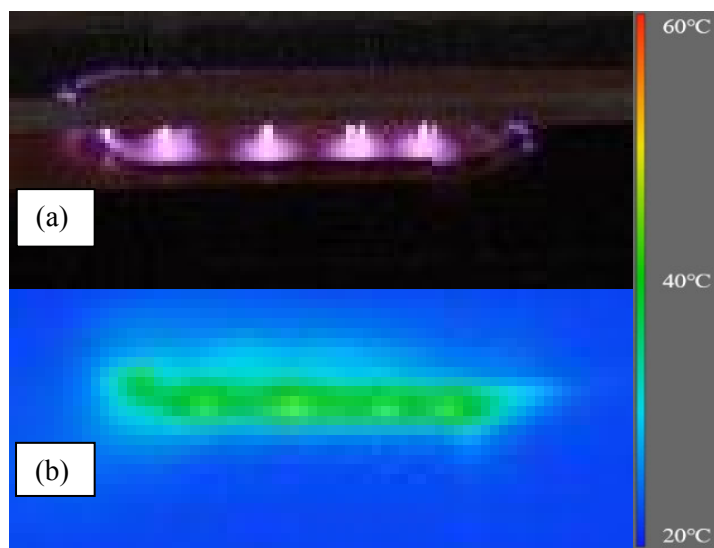

**Fig S2** (a). Snapshot of cellulose under plasma treatment; (b). IR thermographic image for temperature distribution after 5 min. The temperature scale is shown in the right side bar.

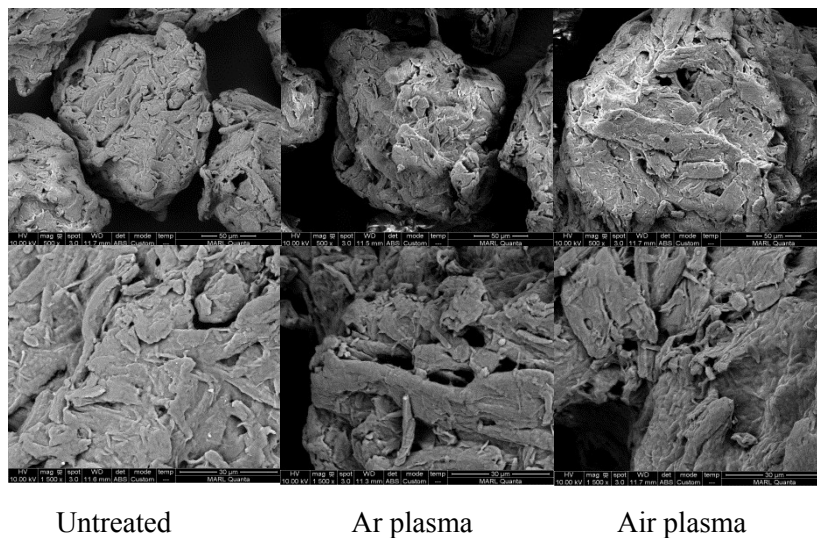

**Fig S3.** SEM images of the untreated and plasma-pretreated cellulose. The AC power condition and pretreatment time are  $f = 17.5$  kV,  $V = 2$  kHz and  $t = 30$  s for the Ar plasma-treated cellulose, and  $f = 15$  kV,  $V = 2$  kHz and  $t = 30$ s for the air plasma-treated cellulose.

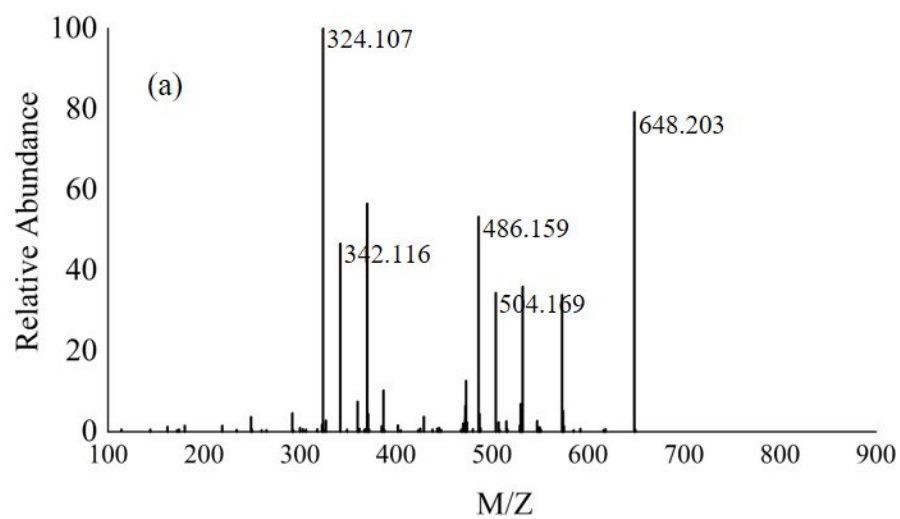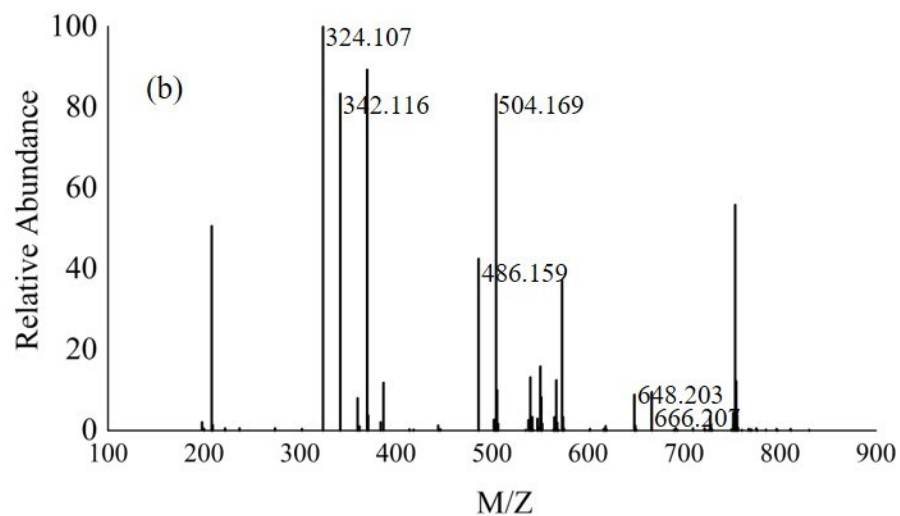

**Fig S4.** LC-MS results of the water-soluble fractions of the plasma pretreated cellulose. (a). the Air plasma pretreated cellulose, (b). the Ar plasma pretreated cellulose. (Plasma pretreatment conditions are  $f = 17.5$  kV,  $V = 2$  kHz and  $t = 30$ s for the Ar plasma, and  $f = 15$  kV,  $V = 2$  kHz and  $t = 30$  s for the air plasma.)

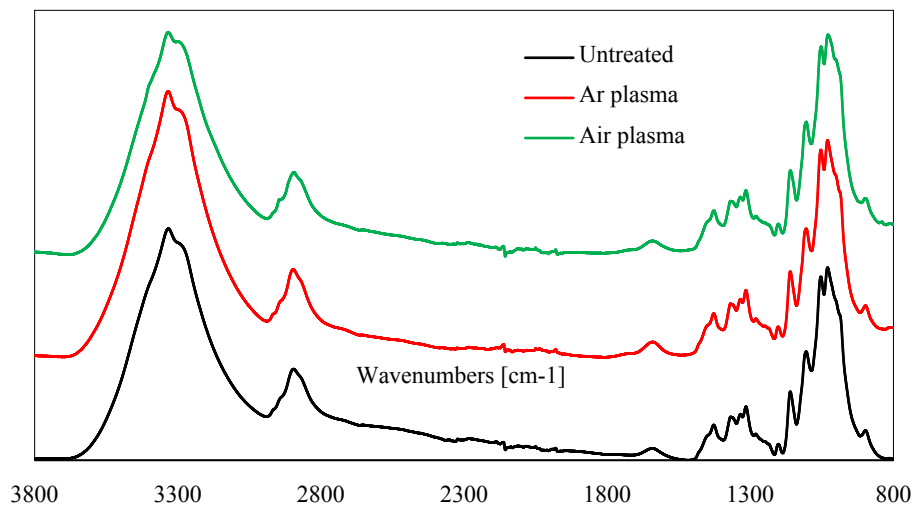

**Fig S5.** FTIR spectra of the untreated and plasma-pretreated cellulose. (Plasma pretreatment conditions are  $f = 17.5$  kV,  $V = 2$  kHz and  $t = 30$  s for the Ar plasma, and  $f = 15$  kV,  $V = 2$  kHz and  $t = 30$  s for the air plasma.)

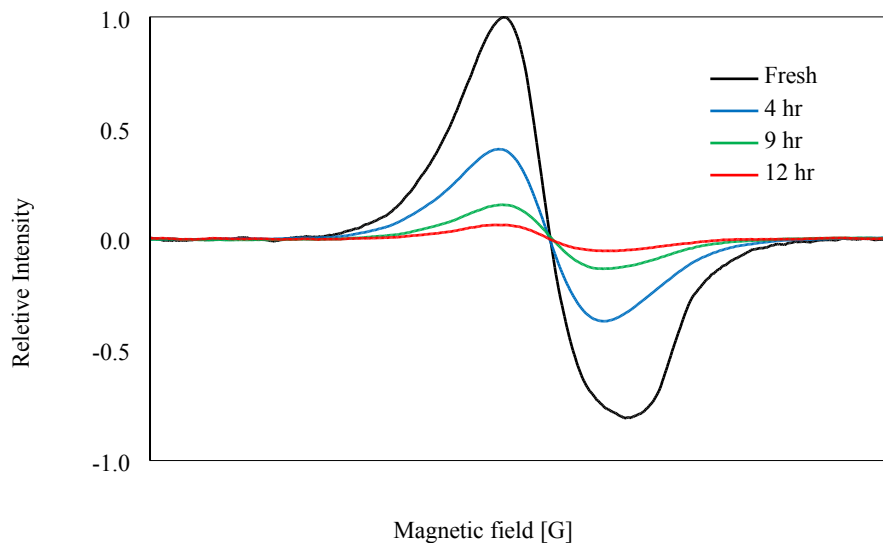

**Fig S6.** EPR spectra of the air plasma-pretreated cellulose stored at ambient air for various times. The “Fresh” sample was analyzed within 30 min after the plasma treatment. (Plasma pretreatment conditions:  $f = 15$  kV,  $V = 2$  kHz,  $t = 30$  s.)

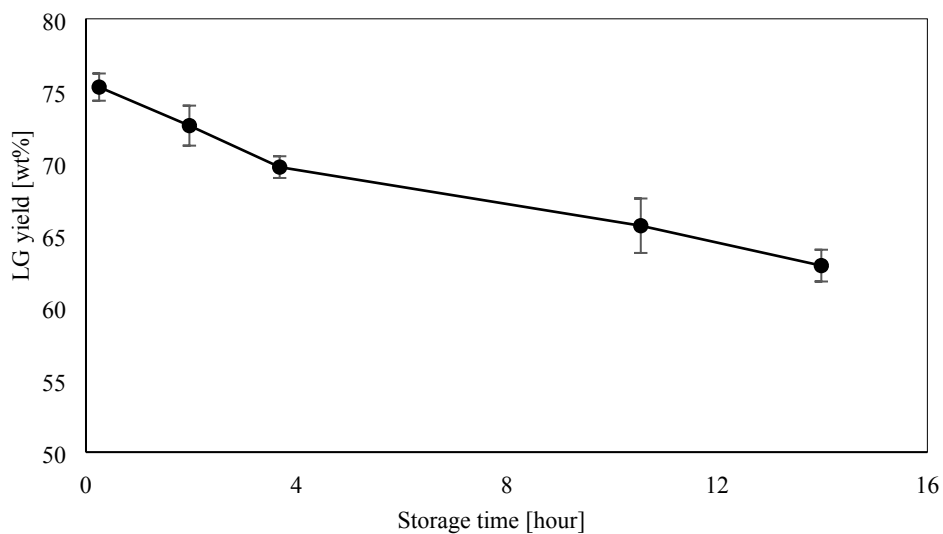

**Fig S7.** LG yield produced from pyrolysis of the air plasma-pretreated cellulose stored at ambient air for various times prior to pyrolysis. (Plasma pretreatment conditions:  $f = 15$  kV,  $V = 2$  kHz,  $t = 30$  s.)

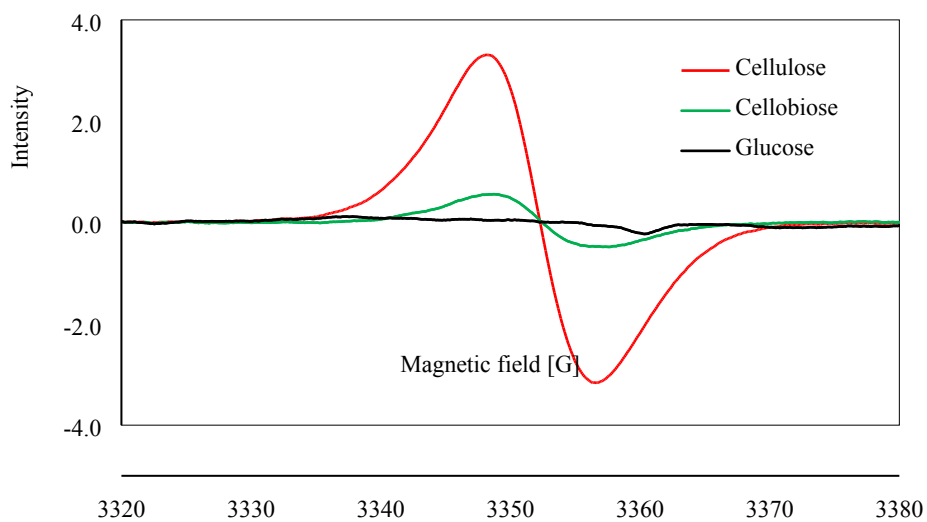

**Fig S8.** EPR spectra of the Ar plasma-pretreated cellulose and saccharides. (Plasma pretreatment conditions:  $f = 17.5$  kV,  $V = 2$  kHz,  $t = 30$  s.)
